# Supplementary material for: Interferon regulatory factor 1 (IRF-1) promotes intestinal group 3 innate lymphoid responses during Citrobacter rodentium infection
Source: PubMed Central journal article supplement (PMC9522774; doi:10.1038/s41467-022-33326-5), 2022-09-29
Supplement: 41467_2022_33326_MOESM1_ESM.pdf [file 41467_2022_33326_MOESM1_ESM.pdf]

**A**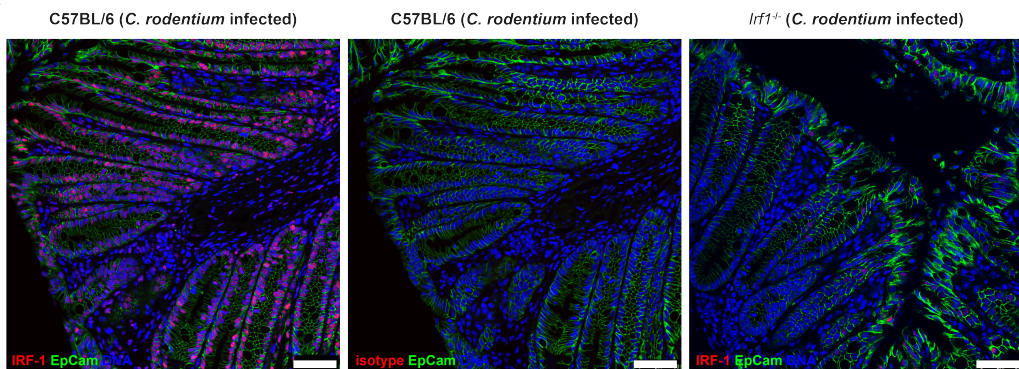**B**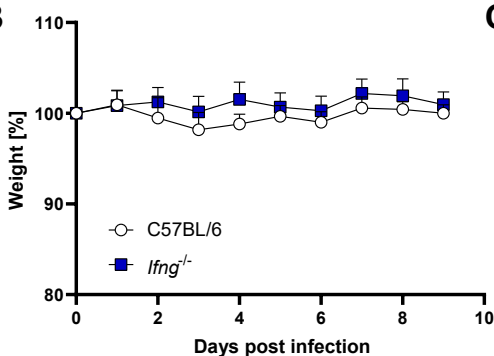**C**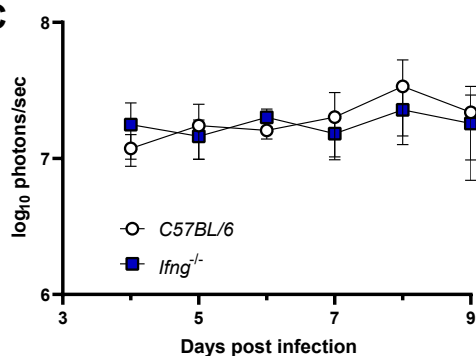**D**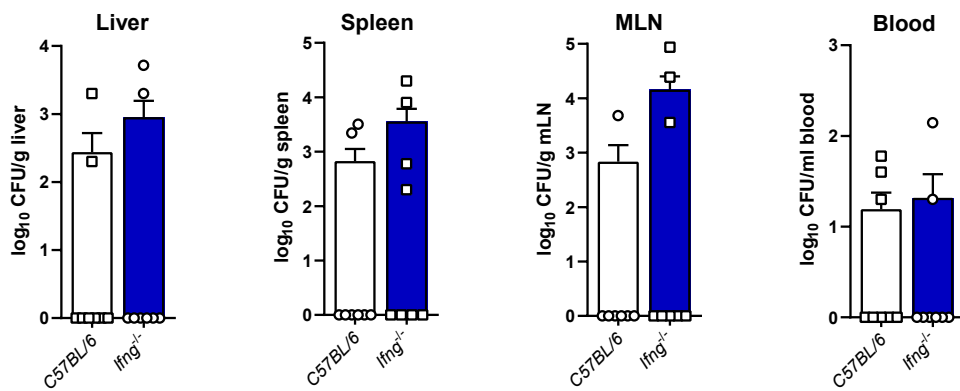**E**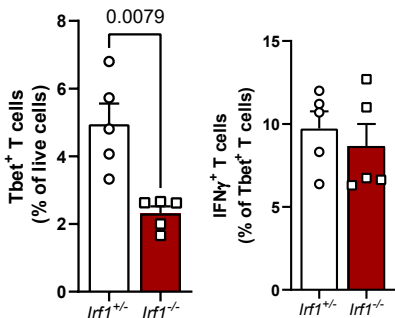**F**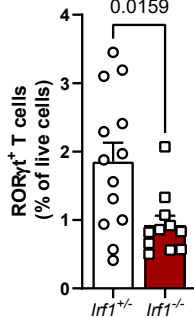**G**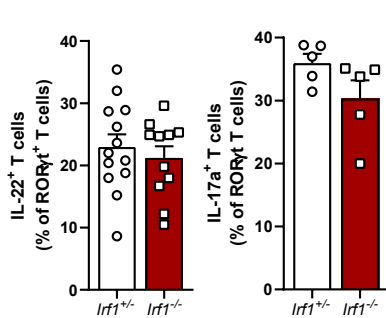

## Supplementary Figure 1

**(A)** Colonic cross sections of *C. rodentium* (9 dpi) infected C57BL/6 or *Irf1*<sup>-/-</sup> mice stained with anti-IRF-1 (red) or isotype control (middle panel), anti-Ep-CAM (green), and DAPI (blue) and analyzed by confocal microscopy. Scale bars represent 50  $\mu$ m. **(B-D)** *Ifn $\gamma$* <sup>-/-</sup> mice were infected with *C. rodentium* and compared to C57BL/6 mice. (B,C) Weight curves are shown as percentage of baseline (n=8/group) and the bacterial load (n=4/group) was measured by *in vivo*-imaging using an IVIS Lumina II system. (D) Dissemination of *C. rodentium* was analyzed by determination of CFU/g tissue from livers, spleens and mLNs as well as of CFU/ml blood 9 dpi (n=8/group). **(E-G)** *Irf1*<sup>+/-</sup> and *Irf1*<sup>-/-</sup> mice were infected with *C. rodentium* and at 8 dpi, LPMCs were isolated from the colon and analyzed by flow cytometry. (E) Graphs show Tbet<sup>+</sup> T cells (lin<sup>+</sup> Thy1.2<sup>+</sup> Tbet<sup>+</sup> cells) and relative abundances of IFN- $\gamma$ <sup>+</sup> Tbet<sup>+</sup> T cells (n=5/group). (F) Frequencies of ROR $\gamma$ t<sup>+</sup> T cells (lin<sup>+</sup> Thy1.2<sup>+</sup> ROR $\gamma$ t<sup>+</sup> cells; *Irf1*<sup>+/-</sup>: n=13, *Irf1*<sup>-/-</sup>: n=11) and (G) relative abundances of T cells expressing IL-22 (*Irf1*<sup>+/-</sup>: n=13, *Irf1*<sup>-/-</sup>: n=11) and IL-17A (n=5/group). Data is expressed as mean  $\pm$  SEM. Exact p values  $\leq$  0.05 as defined by two-tailed Mann-Whitney U test are provided in the figure plots. Source data are provided as a Source data file.

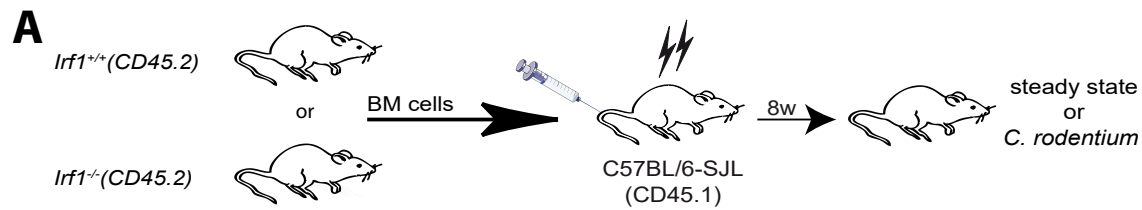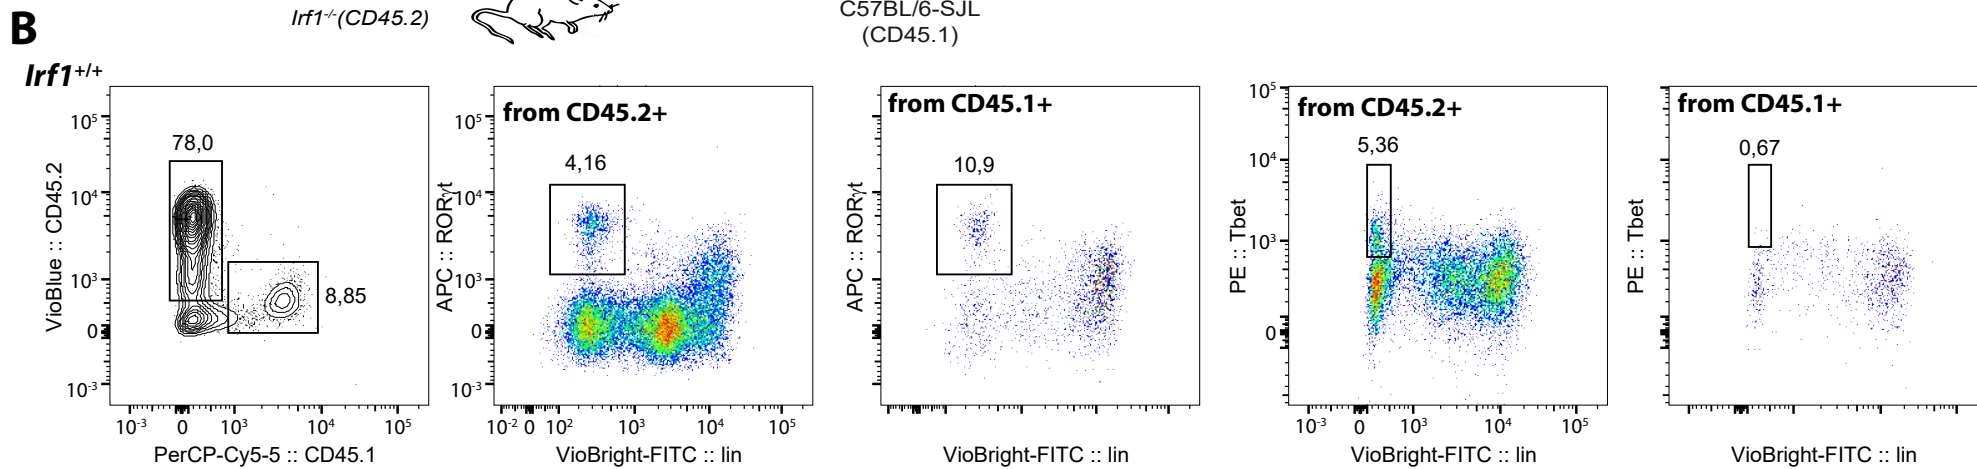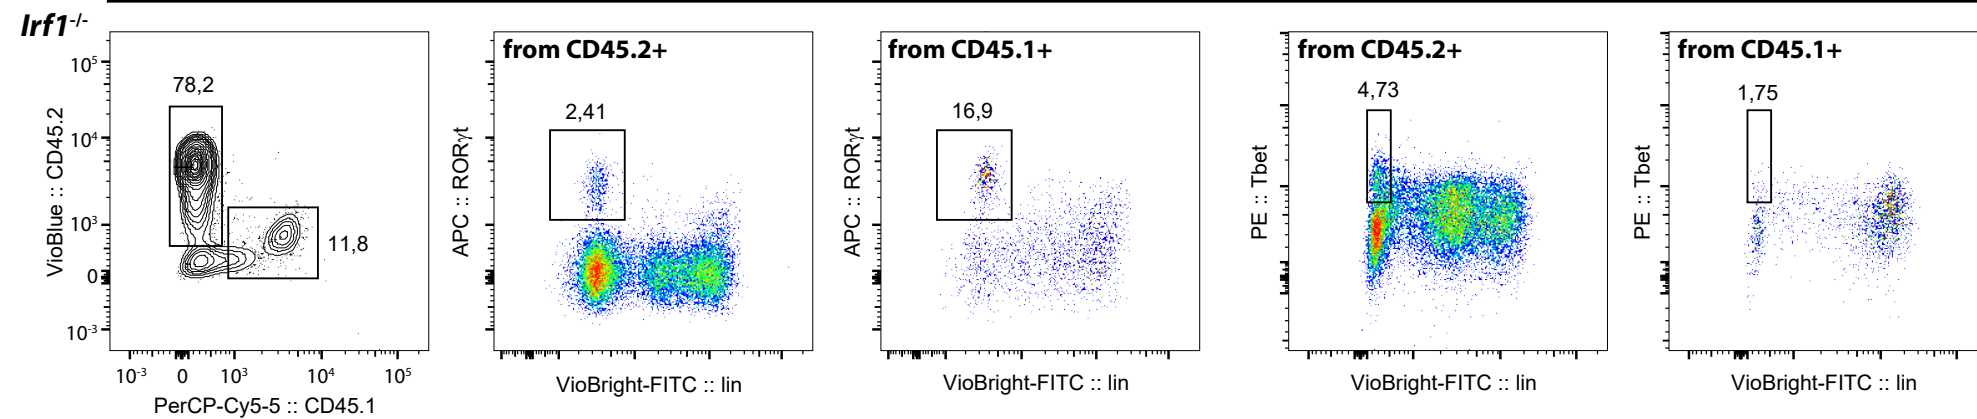

**C** steady state

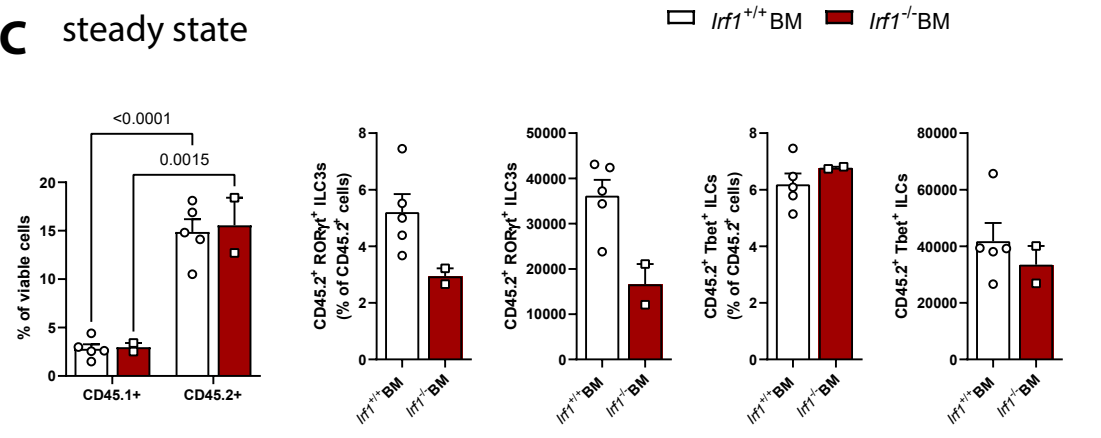

**D** *C. rodentium*

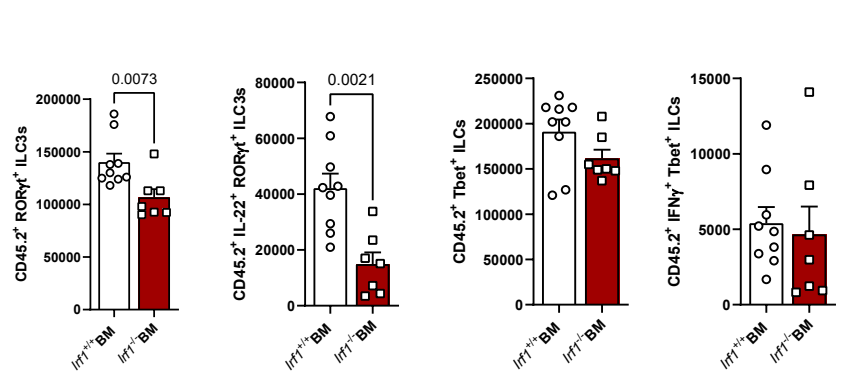

## Supplementary Figure 2

**(A)** Chimeric mice were generated by reconstitution of irradiated congenic C57BL/6-SJL mice (CD45.1<sup>+</sup>) with bone marrow of *Irf1*<sup>+/+</sup> or *Irf1*<sup>-/-</sup> mice. **(B)** Gating strategy to characterize the reconstitution of ROR $\gamma$ t<sup>+</sup> and Tbet<sup>+</sup> ILCs in LPMC by flow cytometry. **(C)** Analysis of ILC frequencies in the steady state (*Irf1*<sup>+/+</sup> : n=5, *Irf1*<sup>-/-</sup> : n=2) . **(D)**. Chimeras were infected with *C. rodentium* and at 9 dpi LPMCs were isolated and analyzed by flow cytometry (*Irf1*<sup>+/+</sup> : n=9, *Irf1*<sup>-/-</sup> : n=7). Data is expressed as mean  $\pm$  SEM. Exact p values with  $\leq 0.05$  as defined by two-tailed ANOVA with Tukey's multiple comparison test (C) or Mann-Whitney U test (D) are provided in the figure plots. Source data are provided as a Source data file.

**A**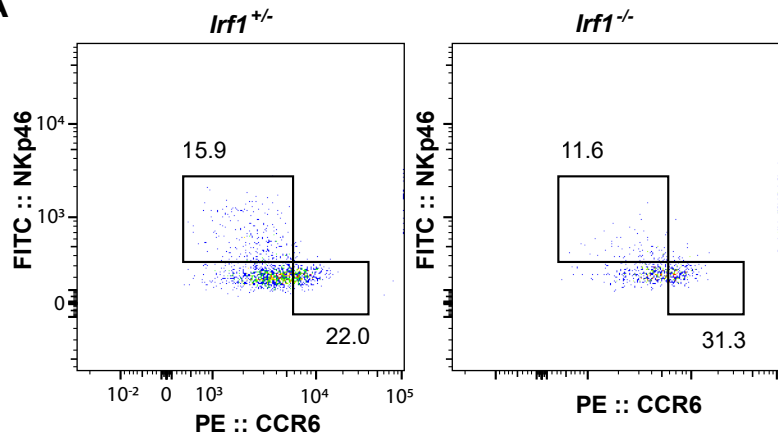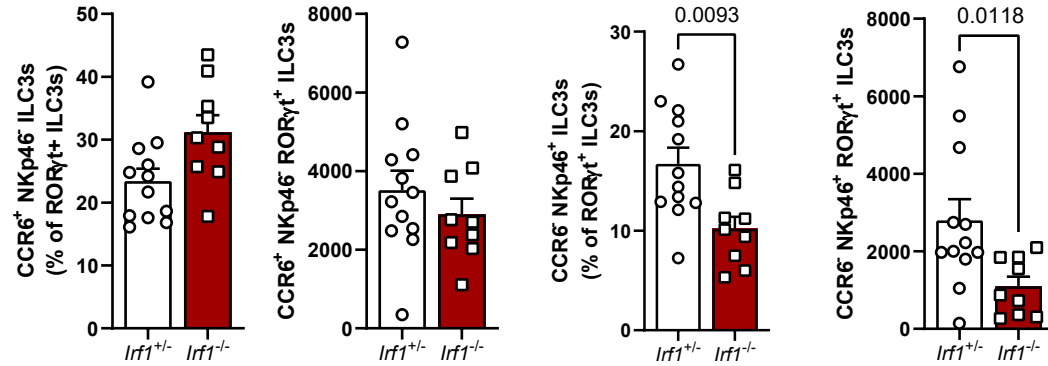**B**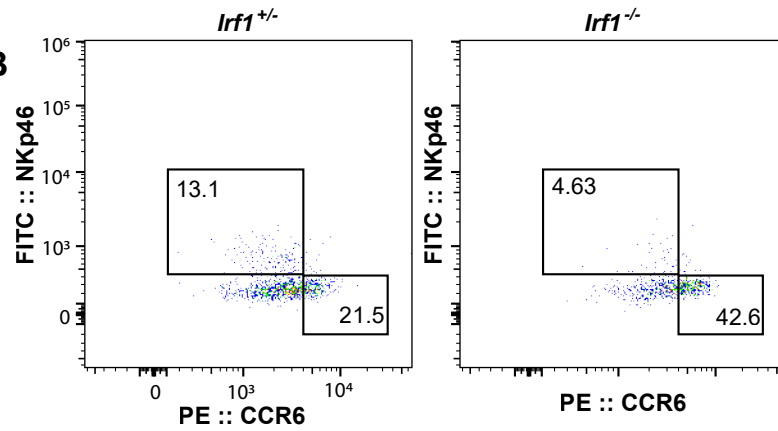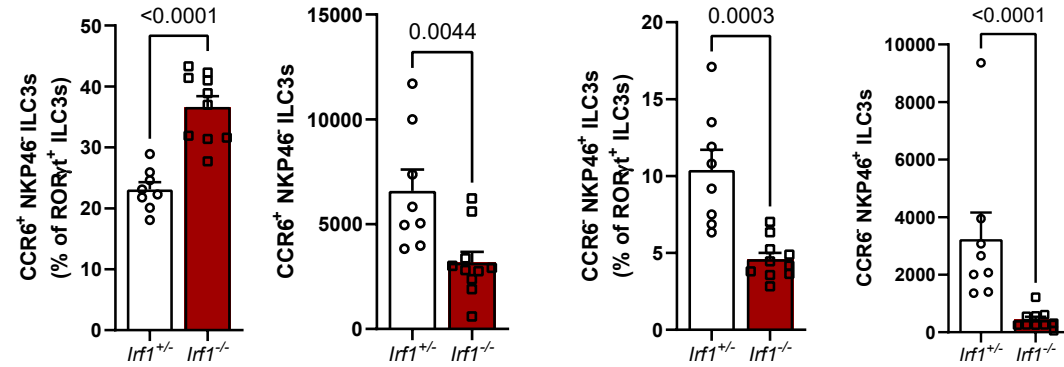**C**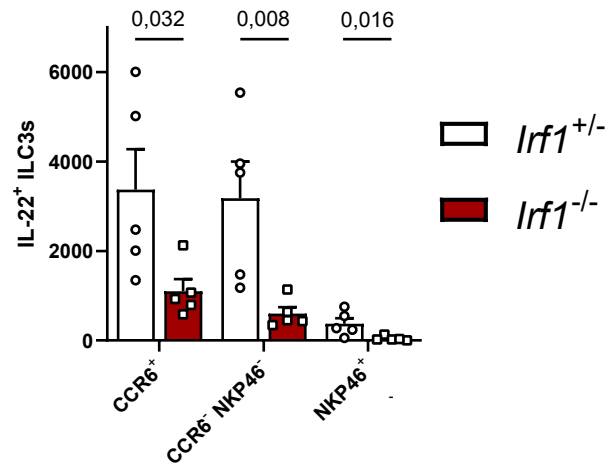**Supplementary Figure 3**

*Irfl*<sup>+/-</sup> and *Irfl*<sup>-/-</sup> mice were left uninfected (**A**) or infected with *C. rodentium* for eight days (**B,C**). Intestinal LPMCs were isolated and analyzed by flow cytometry. NKp46 and CCR6 were stained to determine the frequencies of CCR6<sup>+</sup>NKp46<sup>-</sup> and CCR6<sup>-</sup>NKp46<sup>+</sup> ILC3s (lin<sup>-</sup>Thy1.2<sup>+</sup>RORγt<sup>+</sup> cells) or IL-22 producing ILC3 subtypes. (A) (*Irfl*<sup>+/-</sup> : n=12, *Irfl*<sup>-/-</sup> : n=9). (B) (*Irfl*<sup>+/-</sup> : n=8, *Irfl*<sup>-/-</sup> : n=10). (C) (*Irfl*<sup>+/-</sup> : n=5/group. Data is expressed as mean ± SEM. Exact P values ≤ 0.05 as defined by two-tailed Mann-Whitney U test are provided in the figure plots. Source data are provided as a Source data file.

**A**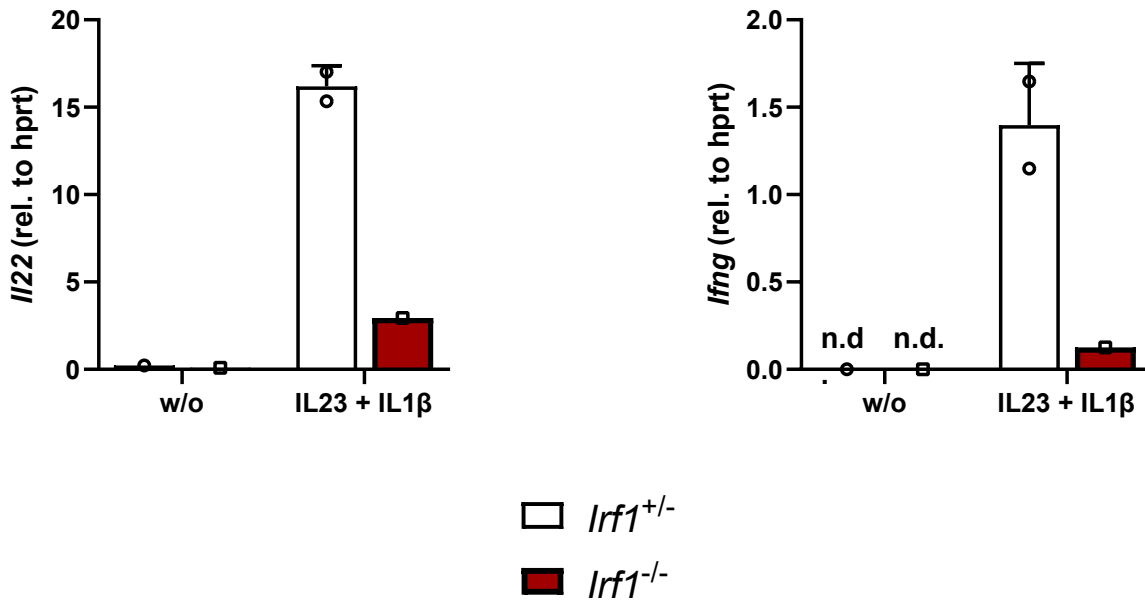**B**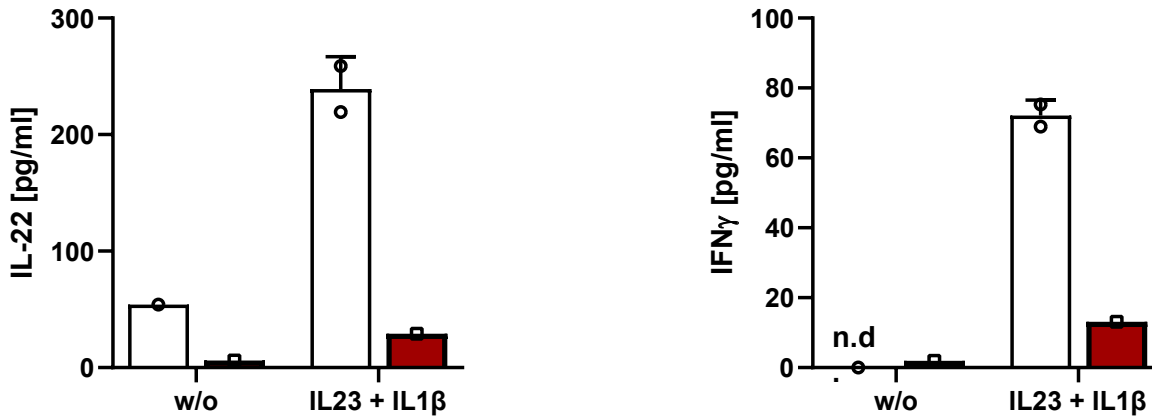

#### Supplementary Figure 4

*Irf1*<sup>+/-</sup> and *Irf1*<sup>-/-</sup> ILCs were sort-purified from LPMC before *in vitro* stimulation with IL-1β (20 ng/ml) and IL-23 (20 ng/ml) or medium. **(A)** Total RNA of ILCs was analyzed by specific qRT-PCR. **(B)** After 24 h, supernatants were collected to measure concentrations of IL-22 and IFN-γ by ELISA. Graphs represent data from three mice/group. Data is expressed as mean ± SEM. n.d. : not detectable. Source data are provided as a Source data file.

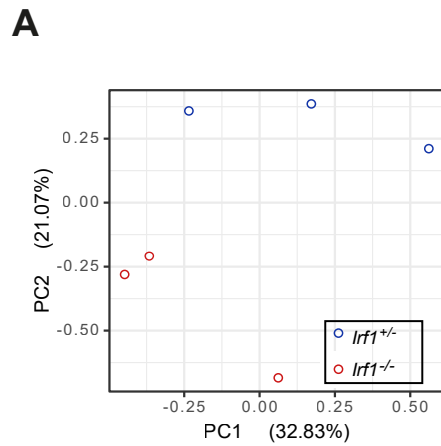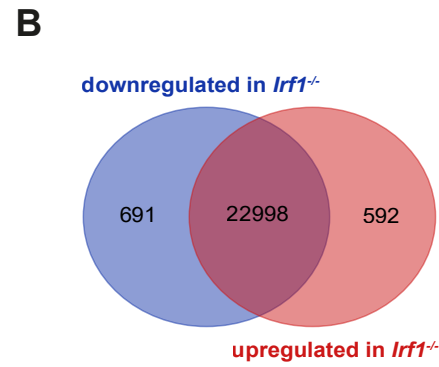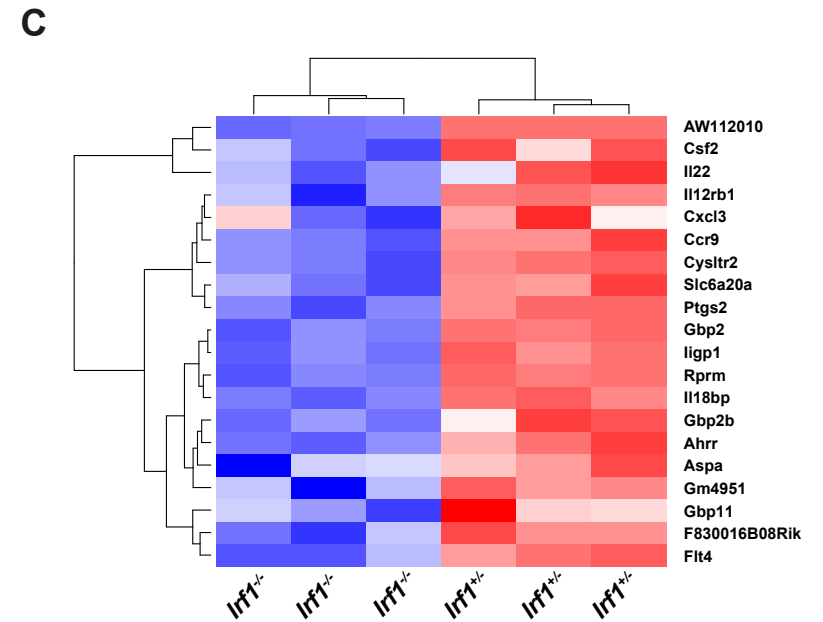

**Enriched KEGG pathways**

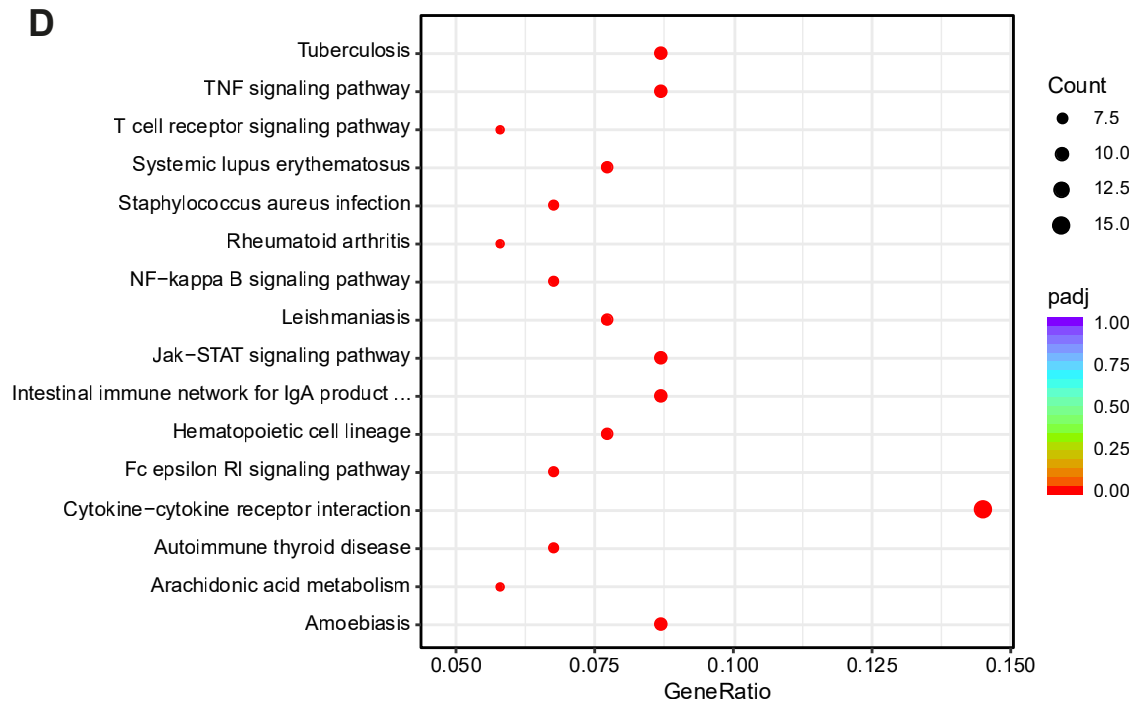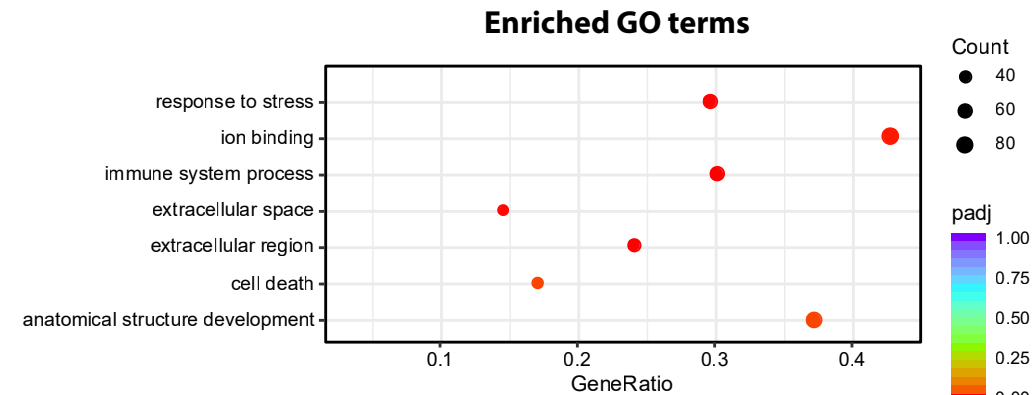

**Supplementary Figure 5**

(A-D) Analysis of gene expression profiling by bulk RNAseq of flow-sorted intestinal ILC1/ILC3s of *C. rodentium* infected *Irf1*<sup>-/-</sup> and *Irf1*<sup>+/-</sup> mice (9 dpi). Bulk RNAseq was conducted with three samples/group with cells sorted from two mice of the same genotype pooled to one sample. Fisher's exact test was used for identification of enriched pathways.

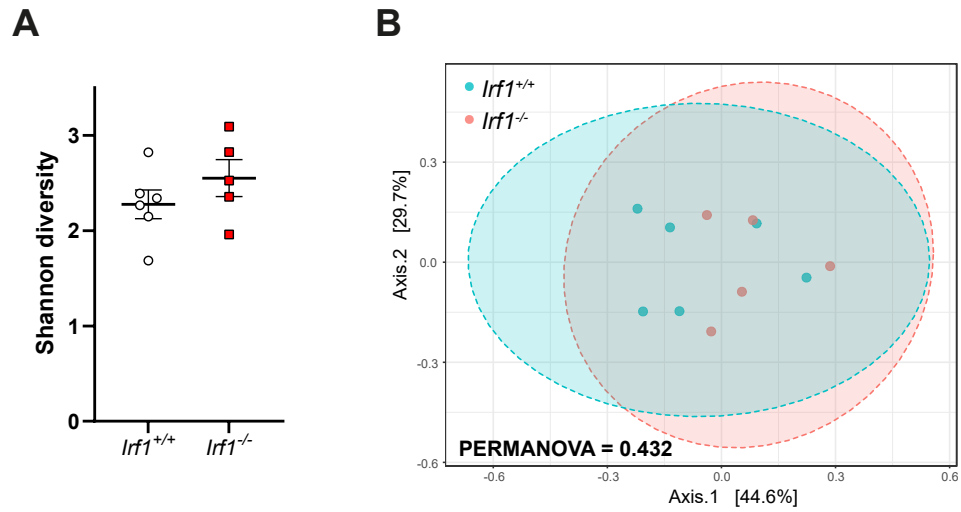

### Supplementary Figure 6

**(A,B)** Fresh stool pellets of untreated, co-housed *lrf1*<sup>+/+</sup> (n=6) and *lrf1*<sup>-/-</sup> (n=5) mice were collected and prepared for 16S-based next generation sequencing. **(A)** Alpha-diversity is presented as Shannon diversity. **(B)** Principal coordinate analysis based on Bray-Curtis dissimilarity.



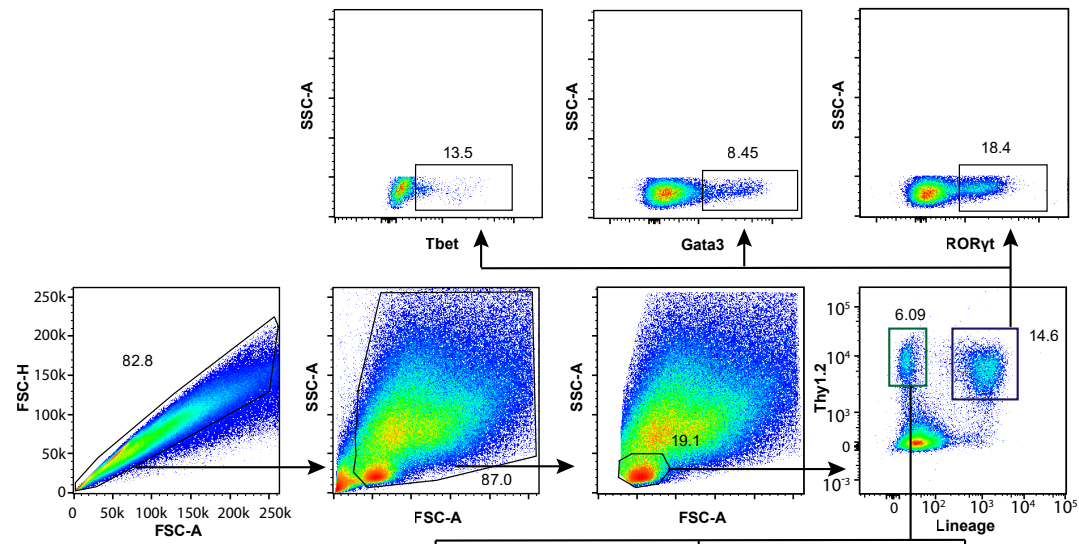

**T helper cell subsets**

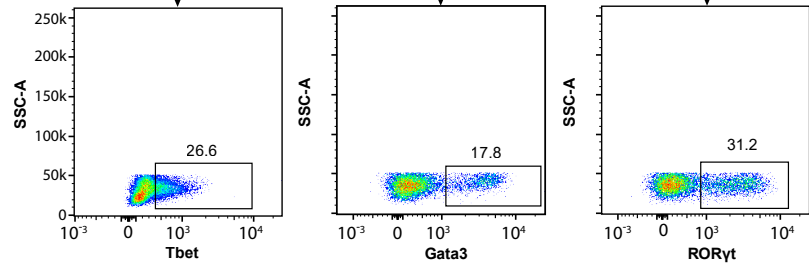

**ILC cell subsets**

**ILC1s**

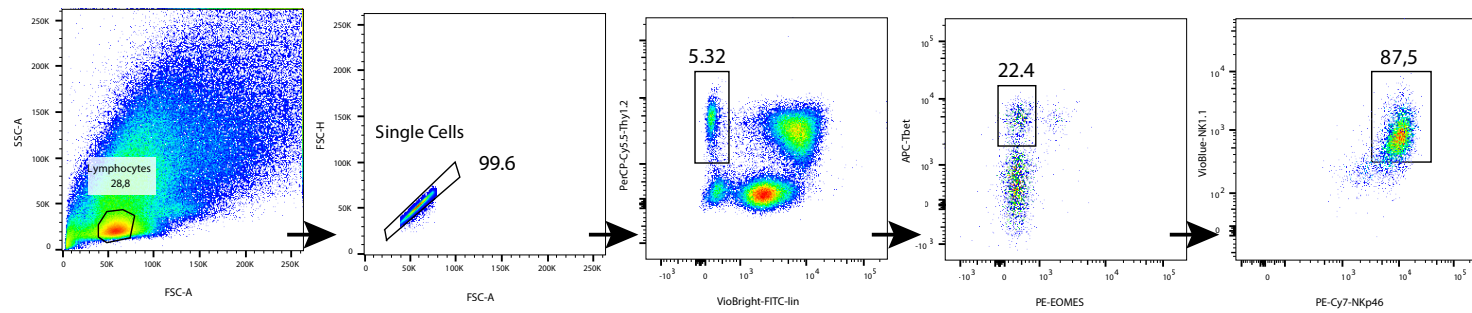

**Supplementary Figure 7**

Gating strategies to characterize the indicated lymphocyte population within intestinal LPMCs by multicolor flow cytometry.
